# Supplementary material for: The protist community traces seasonality and mesoscale hydrographic features in the oligotrophic Sargasso Sea
Source: Frontiers journal article supplement (doi:10.3389/fmars.2022.897140), 2022-08-08
Supplement: Data_Sheet_1.DOCX [file Data_Sheet_1.DOCX]

Supplementary Material

## Supplementary Figures


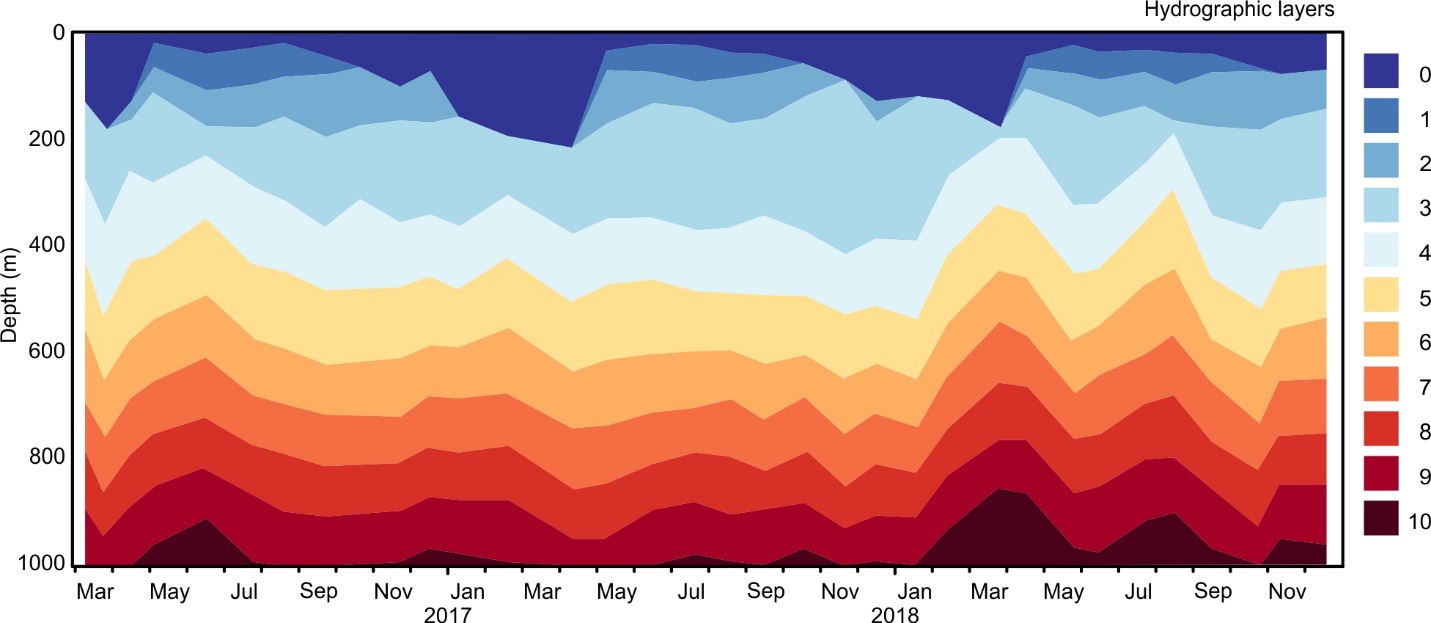


**Supplementary Figure S1**. Hydrographic envelope vertical layer. Vertical layers are defined based in density layers and the CTD-measured fluorescence. See Table 1 in the main text. Layer 0 corresponds to the Mixed Layer.

**Supplementary Figure S2**. Animated gif with the 3-coordinate graphical representatin of the samples from the Chl-*a* maximum samples. The samples from each of the different seasons can be grouped without including any sample from any other season.

**
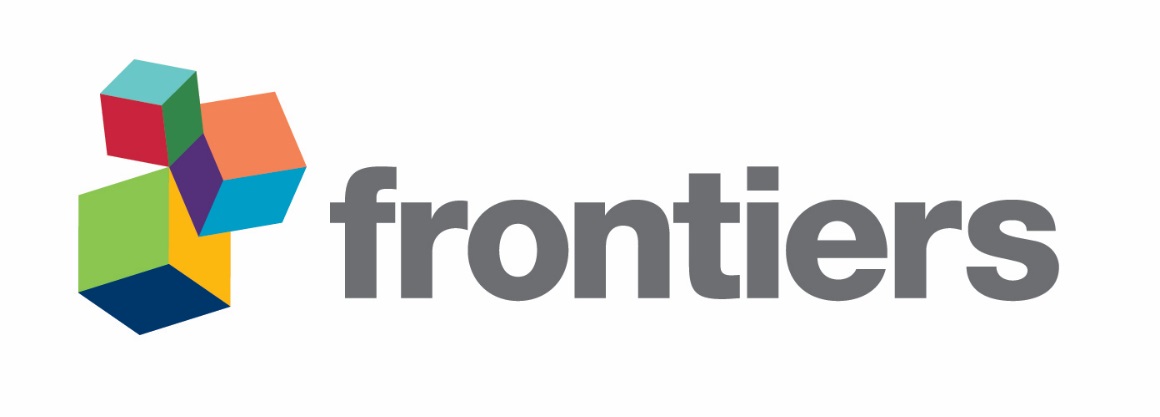
**
